# Supplementary material for: Identifying (un)controllable dynamical behavior in complex networks
Source: PubMed Central journal article supplement (PMC6301693; doi:10.1371/journal.pcbi.1006630), 2018-12-10
Supplement: pcbi.1006630.s003.pdf [file pcbi.1006630.s003.pdf]

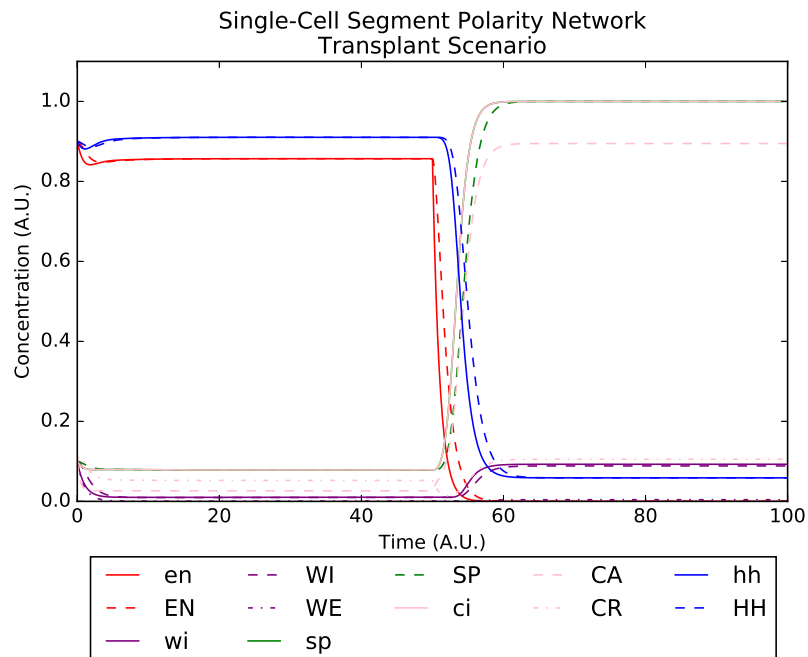

Supplemental Figure 1: Numerical simulation of the *Drosophila* segment polarity network cell-transplant experiment described in the main text. Abbreviations and parameter values are those described in section 6 of S1 Appendix. At  $t = 0$ , the neighboring cells express high *wingless* and low *hedgehog* ( $E_{nbr} = 1$  and  $H_{nbr} = 0$ ). The subject cell begins in an initial state consistent with cell type PC1 (high *engrailed* and *hedgehog*), and quickly approaches the associated steady state. At  $t = 50$ , the expression levels of  $E_{nbr}$  and  $H_{nbr}$  are switched, and the PC1 steady state can no longer be maintained. The system evolves toward a steady state associated with the PC2 cell type (high *sloppy-paired* and *cubitus interruptus*), in agreement with the arguments made in the main text.
